# Supplementary material for: Nuclear heat shock protein 110 expression is associated with poor prognosis and chemotherapy resistance in gastric cancer
Source: PubMed Central journal article supplement (PMC4951298; doi:10.18632/oncotarget.7821), 2016-03-01
Supplement: oncotarget-07-18415-s001.pdf [file oncotarget-07-18415-s001.pdf]

## Nuclear heat shock protein 110 expression is associated with poor prognosis and chemotherapy resistance in gastric cancer

### Supplementary Materials

**Supplementary Table S1: Clinicopathological characteristics of gastric cancer patients according to total HSP110 expression**

| Factors                      | total HSP110 expression in gastric cancer<br>(n = 147) |               | P value |
|------------------------------|--------------------------------------------------------|---------------|---------|
|                              | Low (n = 73)                                           | High (n = 74) |         |
| Age (mean ± standard error)  | 62.8 ± 1.3                                             | 66.0 ± 1.3    | 0.0433* |
| Gender, n (%)                |                                                        |               |         |
| Male                         | 52 (51.5%)                                             | 49 (48.5%)    | 0.5117  |
| Female                       | 21 (45.7%)                                             | 25 (54.3%)    |         |
| Histology, n (%)             |                                                        |               |         |
| Well, Moderate               | 28 (47.5%)                                             | 31 (52.5%)    | 0.6619  |
| Poor, Signet                 | 45 (51.1%)                                             | 43 (48.9%)    |         |
| Depth, n (%)                 |                                                        |               |         |
| sm, mp, ss                   | 40 (44.9%)                                             | 49 (55.1%)    | 0.1561  |
| se, si                       | 33 (56.9%)                                             | 25 (43.1%)    |         |
| Lymph node metastasis, n (%) |                                                        |               |         |
| Absent                       | 25 (51.0%)                                             | 24 (49.0%)    | 0.8155  |
| Present                      | 48 (49.0%)                                             | 50 (51.0%)    |         |
| Lymphatic invasion, n (%)    |                                                        |               |         |
| Absent                       | 8 (47.1%)                                              | 9 (52.9%)     | 0.8195  |
| Present                      | 65 (50.0%)                                             | 65 (50.0%)    |         |
| Venous invasion, n (%)       |                                                        |               |         |
| Absent                       | 59 (54.1%)                                             | 50 (45.9%)    | 0.0856  |
| Present                      | 14 (37.8%)                                             | 23 (62.2%)    |         |
| Stage, n (%)                 |                                                        |               |         |
| I                            | 10 (38.5%)                                             | 16 (61.5%)    | 0.6156  |
| II                           | 26 (53.1%)                                             | 23 (46.9%)    |         |
| III                          | 29 (52.7%)                                             | 26 (47.3%)    |         |
| IV                           | 8 (47.1%)                                              | 9 (52.9%)     |         |

\* $P < 0.05$ .

Well: well differentiated, Moderate: moderately differentiated, Poor: poorly differentiated, Signet: signet ring cell, sm: submucosa, mp: muscularis propria, ss: subserosa, se: serosa exposed, si: serosa infiltrating.

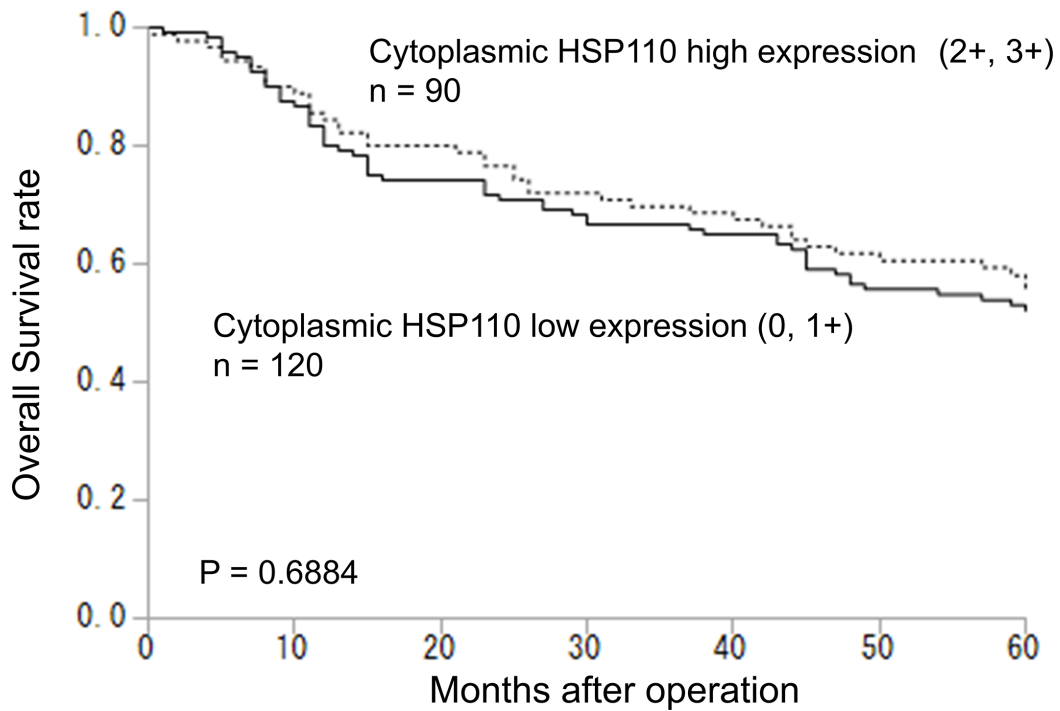

**Supplementary Figure S1: Overall survival of gastric cancer patients according to the cytoplasmic HSP110 expression.**

The intensity of cytoplasmic HSP110 staining was scored as follows: 0, no staining; 1+, weak staining; 2+, moderate staining; 3+, strong staining. We divided 210 gastric cancer patients into the cytoplasmic HSP110 low expression group (0, 1+) and high expression group (2+, 3+), according to this score. No significant difference in prognosis was observed between these groups ( $P = 0.6884$ ).

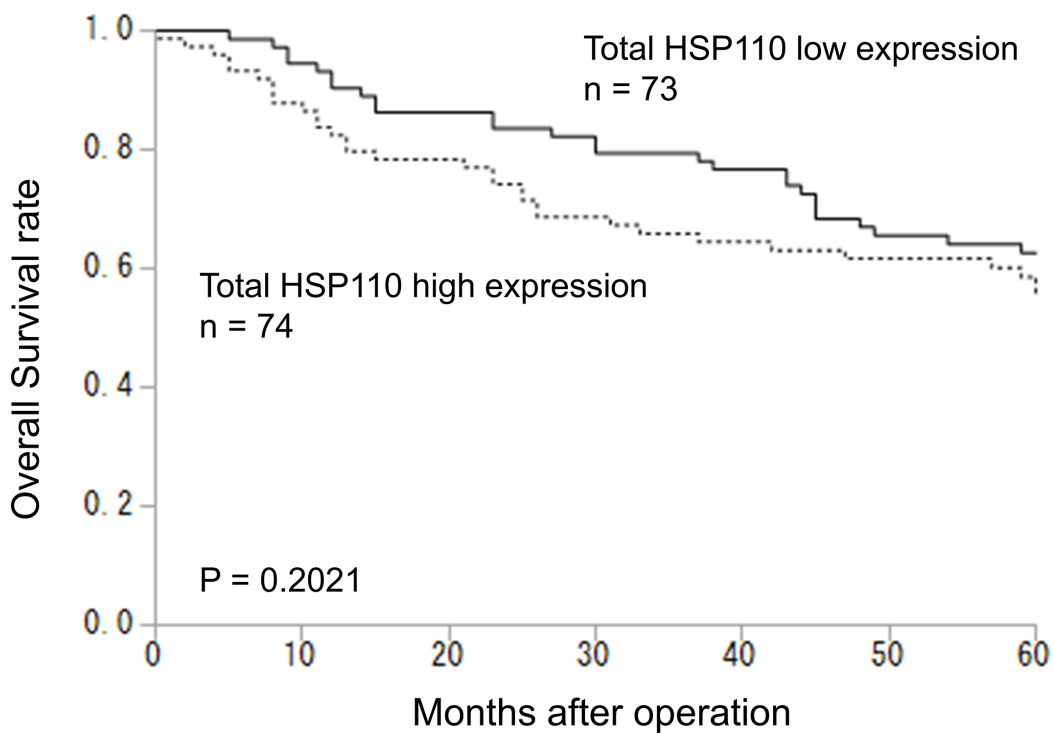

**Supplementary Figure S2: Overall survival of gastric cancer patients according to total HSP110 expression.**

High cytoplasmic and nuclear HSP110 expression groups were defined as total HSP110 high expression group ( $n = 74$ ). Low cytoplasmic and nuclear HSP110 expression groups were defined as total HSP110 low expression group ( $n = 73$ ). No significant prognostic difference was observed between the total HSP110 high expression group and low expression group ( $P = 0.2021$ ).
